# Supplementary material for: Stable sequential dynamics in prefrontal cortex represents subjective estimation of time
Source: eLife. 2024 Dec 11;13:RP96603. doi: 10.7554/eLife.96603 (PMC11634065; doi:10.7554/eLife.96603)
Supplement: Figure 1—source data 1. [file elife-96603-fig1-data1.xlsx]

## Sheet: Sheet1
figure 1B
duration (ms)	rat 1	rat 2	rat 3	rat 4	rat 5	rat 6	rat 7	rat 8	average
session 1	356	561	461	321	404	410	405	228	393
session 2	648	659	554	445	694	629	442	308	547
session 3	489	566	596	633	792	722	620	485	612
session 4	576	878	905	602	853	1034	371	542	720
session 5	736	704	850	636	597	897	995	896	788
session 6	797	703	985	800	1330	1013	860	1082	946
session 7	919	1038	1104	908	1625	997	756	1060	1050
session 8	1058	1272	971	890	1418	907	715	1225	1057
session 9	1458	1442	925	809	1273	1091	1090	1453	1192
session 10	1224	1104	860	1060	1432	1189	1171	1419	1182
session 11	1323	1290	1003	1104	1423	1101	1178	1645	1258
figure 1C
duration (ms)	trials→
long	1576	577	63	312	390	546	188	640	1045	125	110	686	1872	312	530	546	296	530	94	1248	78	156	2075	687	249	2777	702	733	546	546	1232	1498	93	1030	453	437	110	421	546	515	577	1107	312	562	640	31	1029	734	31
short	343	2325	16	1123	2293	156	16	4820	172	702	764	1295	795	733	1124	609	94	62	1498	16	1731	47	546	1029	63	1030	1575	718	140	952	1684	858	1794	920	15	1077	858	1061	31	795	16	1342	578	1482	562	47	499	62	1216
figure 1D
	short	long 1	long 2	long 3
rat 1	66	106	41	77
rat 2	82	75		84
rat 3	60	68		63
rat 4			99	89
rat 5			95	76
[truncated: 5,000 more columns]
