# Supplementary material for: Stable sequential dynamics in prefrontal cortex represents subjective estimation of time
Source: eLife. 2024 Dec 11;13:RP96603. doi: 10.7554/eLife.96603 (PMC11634065; doi:10.7554/eLife.96603)
Supplement: Figure 2—figure supplement 1—source data 1. [file elife-96603-fig2-figsupp1-data1.xlsx]

## Sheet: Sheet1
Figure 2 - figure supplement 1D
rat 1	100	116	146	149
rat 2	74	77	94	59
rat 3	158	165	141	175
rat 4	40	33	46	46
rat 5	47	53	62	59
