# Supplementary material for: Stable sequential dynamics in prefrontal cortex represents subjective estimation of time
Source: eLife. 2024 Dec 11;13:RP96603. doi: 10.7554/eLife.96603 (PMC11634065; doi:10.7554/eLife.96603)
Supplement: Figure 2—figure supplement 2—source data 1. [file elife-96603-fig2-figsupp2-data1.xlsx]

## Sheet: Sheet1
Figure2 - figure supplement 2F
toReward (frame)	13	11	15	11	12	16	19	15	15	19	12	17	0	18	0	36	12	11	15	14	0	13	19	17	15	15	16	17	13	19	16	0	11	14	12	13	17	12	14	12	15	15	16	14	17	20	11	17	13
duration (frame)	47	38	52	43	29	44	56	42	47	46	25	33	5	47	24	30	31	37	57	49	9	36	57	42	44	38	36	38	33	52	51	7	49	56	44	51	57	40	42	30	64	51	34	46	51	38	45	65	47
[truncated: 809 more columns]
