# Supplementary material for: Stable sequential dynamics in prefrontal cortex represents subjective estimation of time
Source: eLife. 2024 Dec 11;13:RP96603. doi: 10.7554/eLife.96603 (PMC11634065; doi:10.7554/eLife.96603)
Supplement: Figure 2—source data 1. [file elife-96603-fig2-data1.xlsx]

## Sheet: Sheet1
figure 2A
correlation coefficient
start Cell	0.68344	0.140211	0.0624001	-0.308037	-0.0920716	0.0900307	0.198063	0.258682	0.189019	-0.052321	0.142008	-0.0605304	0.0251213	-0.133832	-0.240664	0.00964967	-0.0689862	0.086896	0.205385	0.11747	0.245816	0.210869	0.151356	0.305463	0.269279	0.321342	0.305012	0.141523	0.249203	0.112411	0.302182	0.124413	0.292312	0.451011	0.342957	0.149552	0.179355	0.188653	0.107314	0.0793719	-0.0321895	0.267704	0.318742	0.30739	0.24498	0.264879	0.0933331	-0.322573	-0.120439
duration Cell	0.0233651	-0.0385461	-0.0309316	-0.0218546	-0.0166949	-0.0173761	-0.0155033	-0.0158965	-0.0154226	-0.0106935	-0.00563163	-0.00769749	-0.00790866	-0.00976727	-0.0088504	-0.00724697	-0.00756016	-0.00722053	-0.00202509	-0.00312944	-0.00429486	-0.00853275	-0.00913374	-0.0104863	-0.0119537	-0.0106032	-0.0113207	-0.011546	-0.0107163	-0.00923447	-0.00663745	-0.00634154	-0.00570864	-0.00769096	-0.00484168	-0.00990698	-0.00956258	-0.010924	-0.00952477	-0.010661	-0.00900173	-0.0090022	-0.00869757	-0.00876858	-0.00738798	-0.0092044	-0.00844878	-0.0105314	-0.0108545
end Cell	0.429067	-0.521815	-0.202075	-0.109253	-0.0204107	-0.120537	-0.0588457	-0.0395751	-0.110744	0.0254137	-0.149341	-0.250738	-0.177492	-0.118258	0.0911397	0.359851	0.300063	0.405064	0.319579	0.342682	0.162644	0.194713	0.160674	0.226409	0.103812	0.252033	0.275207	0.0479174	-0.0696481	-0.0288608	-0.102648	-0.0611956	-0.135285	-0.0738448	-0.10589	-0.0485733	-0.0493141	-0.0367777	0.0506598	0.0292658	-0.02195	-0.0767914	0.0969192	-0.164462	0.0840534	-0.233833	-0.40134	-0.29594	-0.198344
figure 2C
Model performance	test	shuffle
rat 1	0.9625	0.5007
rat 2	0.918183	0.500316
rat 3	0.9648	0.4987
rat 4	0.9018	0.4996
rat 5	0.9688	0.5007
figure 2I
decoding nose poking time
predicted time	3.14522	2.98343	3.34107	4.53275	5.00941	6.12975	7.02561	8.06147	9.07024	10.2382	11.0473	11.7432	13.1056	14.158	14.9879	16.0642	17.2432	17.7122	19.1011	19.9339	20.9418	22.0862	23.2626	23.806	25.3247	25.916	26.8878	27.5086	28.145	28.7175	28.2716
acutal time	1	2	3	4	5	6	7	8	9	10	11	12	13	14	15	16	17	18	19	20	21	22	23	24	25	26	27	28	29	30	31
figure 2J
RMSE	trace (duration cells)	peak (duration cells)	trace (S+E cell)	peak (S+E)	shuffle
rat 1	1.9798	6.0879	3.83056	7.4185	8.9498
rat 2	2.0224	7.8208	8.4619	8.2025	8.9483
rat 3	0.8404	4.7921	3.1037	6.6748	8.95
rat 4	3.2662	6.4544	6.7356	8.5154	8.9493
rat 5	1.3647	4.2437	5.106	7.5688	8.9505
figure 2K
peak entropy	Duration cells	start and end cells	Motivation factor
rat 1	0.824548	0.504748	0.172
rat 2	0.783294	0.292285	0.2436
rat 3	0.915113	0.538822	0.2701
rat 4	0.644692	0.458146	0.4932
rat 5	0.734319	0.296583	0.9077
[truncated: 52 more columns]
