# Supplementary material for: Stable sequential dynamics in prefrontal cortex represents subjective estimation of time
Source: eLife. 2024 Dec 11;13:RP96603. doi: 10.7554/eLife.96603 (PMC11634065; doi:10.7554/eLife.96603)
Supplement: Figure 3—figure supplement 1—source data 1. [file elife-96603-fig3-figsupp1-data1.xlsx]

## Sheet: Sheet1
figure supplement 3A
cell center coord	last session			next session			shifted next session				distance			shifted distance
cell number
	140	191		146	186		140	189			7.81025			2
	110	160		115	159		110	162			5.09902			2
	121	148		127	145		122	147			6.7082			1.41421
	99	151		103	147		98	151			5.65685			1
	135	170		141	169		136	172			6.08276			2.23607
	157	152		163	150		158	151			6.32456			1.41421
	87	131		91	130		87	134			4.12311			3
	34	211		31	206		33	210			5.83095			1.41421
	153	200		159	199		153	202			6.08276			2
	94	149		95	145		91	149			4.12311			3
	155	235		162	229		156	233			9.21954			2.23607
	120	174		125	169		120	172			7.07107			2
	133	157		137	153		132	155			5.65685			2.23607
	165	137		169	137		165	137			4			0
	194	190		200	188		196	190			6.32456			2
	60	181		64	178		62	183			5			2.82843
	119	238		128	234		122	237			9.84886			3.16228
	45	129		45	122		44	128			7			1.41421
	117	165		123	163		118	166			6.32456			1.41421
	206	189		209	189		206	191			3			2
	103	155		108	151		103	154			6.40312			1
	79	104		80	102		76	106			2.23607			3.60555
	107	181		112	179		107	183			5.38516			2
	173	249		178	246		171	250			5.83095			2.23607
	124	83		127	86		122	85			4.24264			2.82843
	36	63		40	59		38	64			5.65685			2.23607
	113	126		119	125		114	127			6.08276			1.41421
	59	199		62	197		60	201			3.60555			2.23607
	47	162		51	156		50	162			7.2111			3
	98	174		101	167		96	171			7.61577			3.60555
	157	152		160	152		155	153			3			2.23607
	92	190		95	187		91	191			4.24264			1.41421
	163	221		170	218		164	221			7.61577			1
	37	105		36	102		35	108			3.16228			3.60555
	132	178		138	175		133	178			6.7082			1
	70	149		71	145		68	150			4.12311			2.23607
	102	266		106	263		101	265			5			1.41421
	68	204		71	203		69	207			3.16228			3.16228
	64	196		69	193		67	197			5.83095			3.16228
	157	220		162	216		156	219			6.40312			1.41421
	123	132		129	132		124	134			6			2.23607
	128	206		134	204		128	207			6.32456			1
