# Supplementary material for: Stable sequential dynamics in prefrontal cortex represents subjective estimation of time
Source: eLife. 2024 Dec 11;13:RP96603. doi: 10.7554/eLife.96603 (PMC11634065; doi:10.7554/eLife.96603)
Supplement: Figure 3—source data 1. [file elife-96603-fig3-data1.xlsx]

## Sheet: Sheet1
figure 3E
2 days interval	long 1 training	long 2 testing	shuffle		14 days interval	long 1 training	long 2 testing	shuffle		16 days interval	short 1 training	long 2 testing	shuffle
	0.780357	0.523214	0.541071			0.867262	0.474405	0.521429			0.865476	0.5125	0.520238
	0.78631	0.527381	0.520238			0.877381	0.491071	0.505357			0.87619	0.504762	0.5125
	0.773214	0.497024	0.490476			0.885714	0.485119	0.494643			0.858333	0.454762	0.50119
	0.777381	0.532738	0.504167			0.866667	0.470833	0.499405			0.843452	0.495833	0.508929
	0.794048	0.504167	0.541071			0.87619	0.471429	0.529167			0.843452	0.480357	0.525
	0.768452	0.508929	0.491667			0.863095	0.466071	0.499405			0.880357	0.491071	0.524405
	0.801786	0.511905	0.51369			0.866667	0.474405	0.495833			0.863095	0.504167	0.53631
	0.791667	0.4875	0.489286			0.872024	0.471429	0.52619			0.855952	0.491667	0.482738
	0.765476	0.539881	0.504167			0.883333	0.504762	0.48631			0.855357	0.484524	0.51131
	0.829762	0.527381	0.48869			0.87381	0.490476	0.497024			0.872619	0.4875	0.504167
	0.764286	0.513095	0.491667			0.883333	0.478571	0.482738			0.87381	0.480952	0.520238
	0.792262	0.529762	0.527381			0.867262	0.467857	0.457143			0.856548	0.494643	0.505357
	0.804167	0.514881	0.499405			0.85	0.495238	0.505357			0.872024	0.4875	0.52381
	0.798214	0.51369	0.50119			0.883929	0.451786	0.516071			0.84881	0.477976	0.520238
	0.793452	0.52619	0.5125			0.866071	0.477381	0.502381			0.866667	0.467857	0.506548
	0.795833	0.489881	0.494048			0.85	0.48631	0.521429			0.867857	0.469048	0.513095
	0.770238	0.486905	0.507143			0.877381	0.480357	0.516071			0.858929	0.474405	0.503571
	0.815476	0.517857	0.494048			0.845833	0.4875	0.52381			0.86131	0.49881	0.494048
	0.802381	0.52381	0.483333			0.87619	0.492857	0.507143			0.858929	0.477976	0.535119
	0.81131	0.522619	0.525595			0.876786	0.479762	0.506548			0.8625	0.492262	0.511905
	0.769048	0.511905	0.519048			0.860119	0.493452	0.530952			0.877976	0.492857	0.505952
	0.808333	0.479167	0.504762			0.866667	0.479762	0.524405			0.857738	0.482143	0.505952
	0.838095	0.482143	0.489286			0.8625	0.495238	0.505357			0.870833	0.475595	0.517857
	0.766071	0.529762	0.47619			0.857143	0.48869	0.516667			0.8375	0.497619	0.484524
	0.794643	0.535714	0.489286			0.8625	0.480357	0.529762			0.851786	0.48631	0.508929
	0.777976	0.507738	0.490476			0.872619	0.476786	0.516071			0.865476	0.501786	0.489286
	0.767262	0.529762	0.49881			0.867262	0.480952	0.538095			0.860119	0.500595	0.502976
	0.811905	0.517262	0.516071			0.869643	0.494643	0.502381			0.867262	0.479762	0.52381
	0.805357	0.503571	0.520238			0.867857	0.489286	0.492857			0.883929	0.478571	0.504167
	0.797619	0.477976	0.486905			0.873214	0.501786	0.52619			0.852381	0.484524	0.521429
	0.801786	0.520238	0.52619			0.84881	0.488095	0.527381			0.8625	0.482738	0.504167
	0.7875	0.526786	0.507143			0.848214	0.473214	0.4875			0.86369	0.496429	0.517262
	0.80119	0.523214	0.497024			0.869643	0.490476	0.504167			0.855952	0.485714	0.504762
	0.795833	0.4875	0.511905			0.869643	0.480952	0.514286			0.865476	0.497619	0.508333
	0.793452	0.529167	0.485119			0.882143	0.485714	0.48631			0.836905	0.494048	0.492857
	0.81131	0.469048	0.501786			0.859524	0.479762	0.499405			0.839881	0.495238	0.499405
	0.804762	0.524405	0.535714			0.86131	0.473214	0.483929			0.870238	0.489881	0.505952
	0.780357	0.518452	0.505357			0.86131	0.469048	0.496429			0.857738	0.482738	0.515476
	0.750595	0.522024	0.48869			0.872619	0.483929	0.505357			0.865476	0.503571	0.497024
	0.757738	0.523214	0.492857			0.849405	0.469643	0.51131			0.87619	0.485714	0.526786
	0.775595	0.521429	0.499405			0.858929	0.4875	0.522024			0.839286	0.495833	0.5
	0.798214	0.523214	0.488095			0.851786	0.483929	0.499405			0.866667	0.482143	0.528571
	0.825595	0.516667	0.482143			0.854167	0.491071	0.520833			0.876786	0.489286	0.530357
	0.81131	0.520833	0.539286			0.877976	0.492857	0.486905			0.866071	0.486905	0.483929
	0.784524	0.503571	0.507143			0.868452	0.477381	0.499405			0.858333	0.467262	0.48869
	0.802381	0.473214	0.523214			0.875595	0.463095	0.525595			0.860714	0.504167	0.507143
	0.789286	0.467262	0.488095			0.870833	0.492857	0.51131			0.8625	0.508929	0.493452
	0.797024	0.528571	0.525595			0.866071	0.48631	0.526786			0.85119	0.49881	0.505952
	0.797619	0.488095	0.497619			0.870833	0.482143	0.482143			0.870833	0.490476	0.506548
	0.772619	0.508929	0.457738			0.85119	0.482738	0.504167			0.860119	0.48631	0.507738
figure 3G
2 days interval	long 1 training	long 2 testing	shuffle		14 days interval	long 1 training	long 2 testing	shuffle
	3.48118	6.49047	8.96254			3.68175	6.11191	8.97961			1.71797	4.97136	8.96192
	3.38702	5.94301	8.94945			3.40287	5.99875	8.97195			1.80002	4.9494	8.95819
	3.44251	5.86761	8.95171			3.27306	6.0629	8.9618			1.86276	4.77563	8.9514
	3.49613	6.5304	8.9793			3.34612	6.39612	8.95285			1.8213	4.81933	8.96356
	3.59576	6.30714	8.95731			3.347	6.26032	8.94954			1.82678	5.06781	8.99105
	3.53672	6.48434	8.95875			3.40499	6.30313	8.97149			1.87213	4.71921	8.94568
	3.60338	6.25854	8.94805			3.49486	5.90339	8.95461			1.85094	5.28705	8.95351
	3.2212	5.81785	8.99388			3.3591	6.30252	8.96579			1.90123	4.8784	8.99461
	3.15383	6.20358	8.94481			3.55751	6.1522	8.95122			1.70896	4.99884	8.95589
	3.51096	6.28547	8.94799			3.17289	5.49821	8.94694			1.88278	4.90464	8.95204
	3.50087	6.52976	8.94794			3.04086	5.93471	8.94885			1.83781	4.82968	8.95264
	3.30303	6.30294	8.97188			3.2831	5.80812	8.95902			1.77088	4.58502	8.96071
	3.38174	6.42339	8.94882			3.19989	6.12989	8.95117			1.79133	4.75826	8.95374
	3.73187	6.14325	8.96951			3.43846	5.84313	8.95161			1.84584	4.90681	8.95381
	3.47705	6.08467	8.96704			3.19141	6.09861	8.9473			1.95807	4.67542	8.94916
	3.56826	6.1605	8.96187			3.42068	6.54447	8.95791			1.95856	4.6654	8.94611
	3.39353	6.18019	8.94601			3.60525	6.67025	8.94459			1.66884	4.95899	8.94575
	3.47168	5.95566	8.95012			3.18983	6.38016	8.96002			1.86947	4.74438	8.94683
	3.15384	6.25964	8.94916			3.44117	5.84811	8.94831			1.70484	5.06261	8.95228
	3.36973	5.9569	8.96952			3.23927	5.9594	8.95123			1.83604	4.76927	8.94619
	3.42712	6.40182	8.94562			3.36255	5.82842	8.95551			1.86844	4.61235	8.94696
	3.47271	6.05532	8.95606			3.48607	6.34325	8.96339			2.07091	4.75738	8.94534
	3.58876	6.08045	8.9504			3.40702	6.04169	8.94642			1.87499	4.90745	8.97869
	2.9403	6.11073	8.945			3.52306	5.82058	8.94902			1.89053	5.17863	8.97978
	3.12551	5.51001	8.95194			3.59153	7.4433	8.97607			2.00349	4.74422	8.94985
	3.04215	6.59399	8.95248			3.64007	6.38816	8.97544			1.80805	4.96192	8.95038
	3.24538	5.79527	8.94707			3.60105	5.83351	8.94877			1.7149	4.8943	8.95233
	3.32231	5.96593	8.94697			3.51237	6.17996	8.9549			1.90752	4.8886	8.95824
	3.55075	5.68512	8.96285			3.31332	5.93812	8.95829			1.9564	4.77757	8.95712
	2.93095	5.61765	8.94989			3.33382	6.03308	8.94559			1.93909	4.84776	8.95782
	3.20271	6.10554	8.96203			3.14221	6.15944	8.94822			1.95041	4.94706	8.94843
	3.60721	6.22704	8.96102			3.37304	5.61759	8.98283			1.83611	4.73093	8.95939
	3.3051	6.12631	8.94771			3.68584	6.73694	8.94872			1.76672	4.99038	8.95901
	3.11881	6.20244	8.96606			3.41606	5.8395	8.96381			2.04005	4.73639	8.94671
	3.42131	5.57128	8.95516			3.38358	6.41522	8.94744			1.92891	4.87818	8.95457
	3.43931	6.47036	8.95038			3.4182	6.25645	8.95915			1.97506	4.79303	8.9553
	3.50173	6.17266	8.94773			3.40492	6.13021	8.96299			1.90566	4.8766	8.96424
	3.13881	6.09092	8.94638			3.6468	6.04617	8.94806			1.89969	4.85578	8.95521
	3.5109	6.51897	8.96883			3.40045	6.14448	8.97051			1.83612	4.88694	8.94744
	3.44263	5.90769	8.9473			3.20379	5.72902	8.94915			1.82041	4.7233	8.9598
