# Supplementary material for: Stable sequential dynamics in prefrontal cortex represents subjective estimation of time
Source: eLife. 2024 Dec 11;13:RP96603. doi: 10.7554/eLife.96603 (PMC11634065; doi:10.7554/eLife.96603)
Supplement: Figure 4—figure supplement 1—source data 1. [file elife-96603-fig4-figsupp1-data1.xlsx]

## Sheet: Sheet1
figure supplement 4E
RMSE	Correct trials				Incorrect trials				Correct + incorrect trials				shuffle
	session 1	session 2	session 3	session 4	session 1	session 2	session 3	session 4	session 1	session 2	session 3	session 4
rat 1	1.2305	1.8306	1.1135	1.2914	2.2097	2.676	2.3928	1.557	1.3778	2.7327	1.6513	1.3565	9
rat 2	3.0235	3.0297	3.6236		4.2502	4.1307	6.8594		3.2362	3.3715	4.5394		9
rat 3	1.1765	1.1196	2.1398		1.6375	1.1278	1.121		1.3906	1.1468	1.9245		9
rat 4	1.9409	6.4865	1.8475		1.725	4.9162	1.7787		2.0342	5.9887	1.8841		9
rat 5		1.9825	1.4845		3.6937	1.734			2.2568	1.4995			9
