# Supplementary material for: Stable sequential dynamics in prefrontal cortex represents subjective estimation of time
Source: eLife. 2024 Dec 11;13:RP96603. doi: 10.7554/eLife.96603 (PMC11634065; doi:10.7554/eLife.96603)
Supplement: Figure 4—source data 1. [file elife-96603-fig4-data1.xlsx]

## Sheet: Sheet1
figure 4F
explained variance	Duration cell	start and end cells
rat 1	0.61536	0.30758
rat 2	0.245259	0.181609
rat 3	0.499951	0.106633
rat 4	0.320393	0.0160739
rat 5	0.537411	0.316731
figure 4H
cell level
Incorrect trials	1.11671	0.253191	0.923602	0.536399	0.304453	0.694966	0.90098	0.759003	0.902548	0.875685	0.746076	0.78417	1.38506	0.448982	0.516737	1.14256	0.858306	1.13043	1.11582	0.75911	0.221049	0.389189	0.858624	0.846623	0.87699	0.788219	0.64183	0.75353	0.983657	0.764942	0.592972	0.671907	0.926837	1.44309	1.03462	0.827054	1.01492	1.17429	0.495043	0.734748	0.399592	0.61285	1.15618	1.28398	0.374961	1.13151	1.12635	2.08435	2.35153
Incorrect duration	25	5	24	9	7	17	25	19	21	23	29	21	29	12	12	27	28	27	26	23	4	13	16	28	26	22	21	24	24	24	13	20	22	25	23	20	18	24	24	26	5	23	24	21	6	23	22	24	29
Correct trials	1.80304	1.33531	1.65327	2.15829	1.34753	0.863568	1.62274	1.35879	2.14872	1.77452	1.59631	1.46414	1.58337	1.54422	1.64549	1.67647	2.08928	1.98252	1.60185	1.98122	1.65835	1.19467	1.59044	1.96916	1.47226	1.40115	1.8087	1.36827	1.69292	2.37142	1.80049	1.82009	2.60489	1.92188	1.94275	2.17637	2.00294	2.14731	1.57615	2.32926	1.94475	1.1506	1.72378	1.39424	1.12537	1.447	1.51015	2.39772	1.78373
Correct duration	47	43	44	56	46	33	47	57	49	57	42	44	38	38	51	49	56	44	51	57	40	42	64	51	34	46	51	38	45	65	47	44	57	41	53	43	52	38	41	52	52	34	41	37	36	30	40	45	49
figure 4J
Ensemble level
Incorrect trials	1	1.5	0.96	0.83	1.75	0.7	1	2	1.09	2	1	0.75	1.18	0.5	0.6	1.11	1.1	1.04	1.07	0.95	1.5	0.6	1.91	1.16	1.04	0.55	0.8	1	0.96	0.94	0.51	0.75	1	1	2	1	0.71	0.93	1	0.96	1.67	0.94	1	0.84	1.75	0.8	0.9	1	1.95
Incorrect duration	25	5	24	9	7	17	25	19	21	23	29	21	29	12	12	27	28	27	26	23	4	13	16	28	26	22	21	24	24	24	13	20	22	25	23	20	18	24	24	26	5	23	24	21	6	23	22	24	29
Correct trials	1.9	1.54	1.96	0.5	1.96	1.4	1.9	1.92	1.67	2	0.5	1.82	1.45	1.5	1.96	1.96	2	1.75	1.97	2	1.54	1.44	0.5	2	1.92	1.9	1.97	2	1.84	2	0.5	1.83	0.5	1.83	0.5	0.5	0.5	1.66	1.65	2	2	1.4	1.65	1.5	1.47	1.19	1.6	1.79	1.96
Correct duration	47	43	44	56	46	33	47	57	49	57	42	44	38	38	51	49	56	44	51	57	40	42	64	51	34	46	51	38	45	65	47	44	57	41	53	43	52	38	41	52	52	34	41	37	36	30	40	45	49
figure 4K
cell level	Incorrect trial	Correct trial
rat 1	0.710206	1.69705
rat 2	0.792785	1.52286
rat 3	0.795241	0.966879
rat 4	1.01431	1.70626
rat 5	0.866005	1.22035
figure 4L
Ensemble level	Incorrect trial	Correct trial
rat 1	1.20333	1.54925
rat 2	0.9625	1.46737
rat 3	1.015	1.2712
rat 4	1.0875	1.28411
rat 5	1.0477	1.249
figure 4N
RMSE	Correct trial	Incorrect trial	Correct+Incorrect trial
	1.2052	1.1973	1.1654
	1.4253	1.7728	1.3334
	1.2691	1.2157	1.1832
	4.633	3.3396	3.9822
	1.2437	1.0914	1.1263
	1.0916	1.3473	1.1562
	0.7518	1.0584	0.7391
	1.5834	1.0913	1.4681
	3.3689	3.464	2.6037
	2.6761	1.8307	2.0679
	2.4958	3.8138	3.1325
	1.2737	1.4371	1.0813
	1.1882	2.2157	1.576
	0.8857	2.074	1.0989
	1.083	1.3528	1.0016
figure 4O
Accumulative errors
Incorrect trials	1.25548	-1.2691	3.07848	0.334214	0.191161	-3.54816	1.04354	2.02098	8.23413	-3.7046	2.58425	0.2836	-0.573522	-3.69306	-3.2947	2.28787	1.41121	-1.99601	-2.19809	-6.71484	-4.0909	-4.22769	-6.17142	-8.63688	-5.06918	1.00569	-4.56555	0.728002	-1.5922	-5.04312	-3.98379	-3.2088	-5.79939	2.33994	-1.37647	-3.51713	-0.660249	0.0128575	-1.65666	0.697947	-48.7267	6.43418	-7.13728	6.63521	-3.60057	-12.6486	18.566	-18.6412	3.98311
Incorrect duration (frame)	38	29	42	25	5	24	30	31	37	9	36	33	7	30	25	19	21	44	23	17	29	13	36	29	22	26	26	24	1	23	23	23	20	7	25	20	28	24	14	28	21	7	24	28	31	16	15	16	24
Correct trials	-0.658643	3.43166	1.87204	0.388623	3.11946	1.21726	1.25376	0.372272	0.364864	2.15298	0.31934	1.67874	-0.00015595	1.78974	0.465887	0.406628	0.0767172	5.40998	7.97703	6.08956	4.12473	14.8029	16.3172	3.53284	3.84846	9.56383	-0.818029	3.10464	-1.59264	-3.62792	3.32024	2.29288	3.68927	5.71659	3.4067	1.16394	1.78738	3.08781	2.72368	-0.190121	1.44115	2.51842	0.447939	1.8362	4.55953	3.41008	2.23942	0.495421	0.340691
Correct duration (frame)	45	46	53	41	52	38	57	57	47	49	65	34	43	33	45	52	42	45	31	34	38	42	28	40	41	34	46	29	29	36	43	32	35	52	33	29	30	30	26	28	65	93	58	74	84	248	87	52	54
[truncated: 318 more columns]
